# Supplementary material for: Genetic interplay between human longevity and metabolic pathways — a large‐scale eQTL study
Source: PubMed Central journal article supplement (PMC5506416; doi:10.1111/acel.12598), 2017-04-19

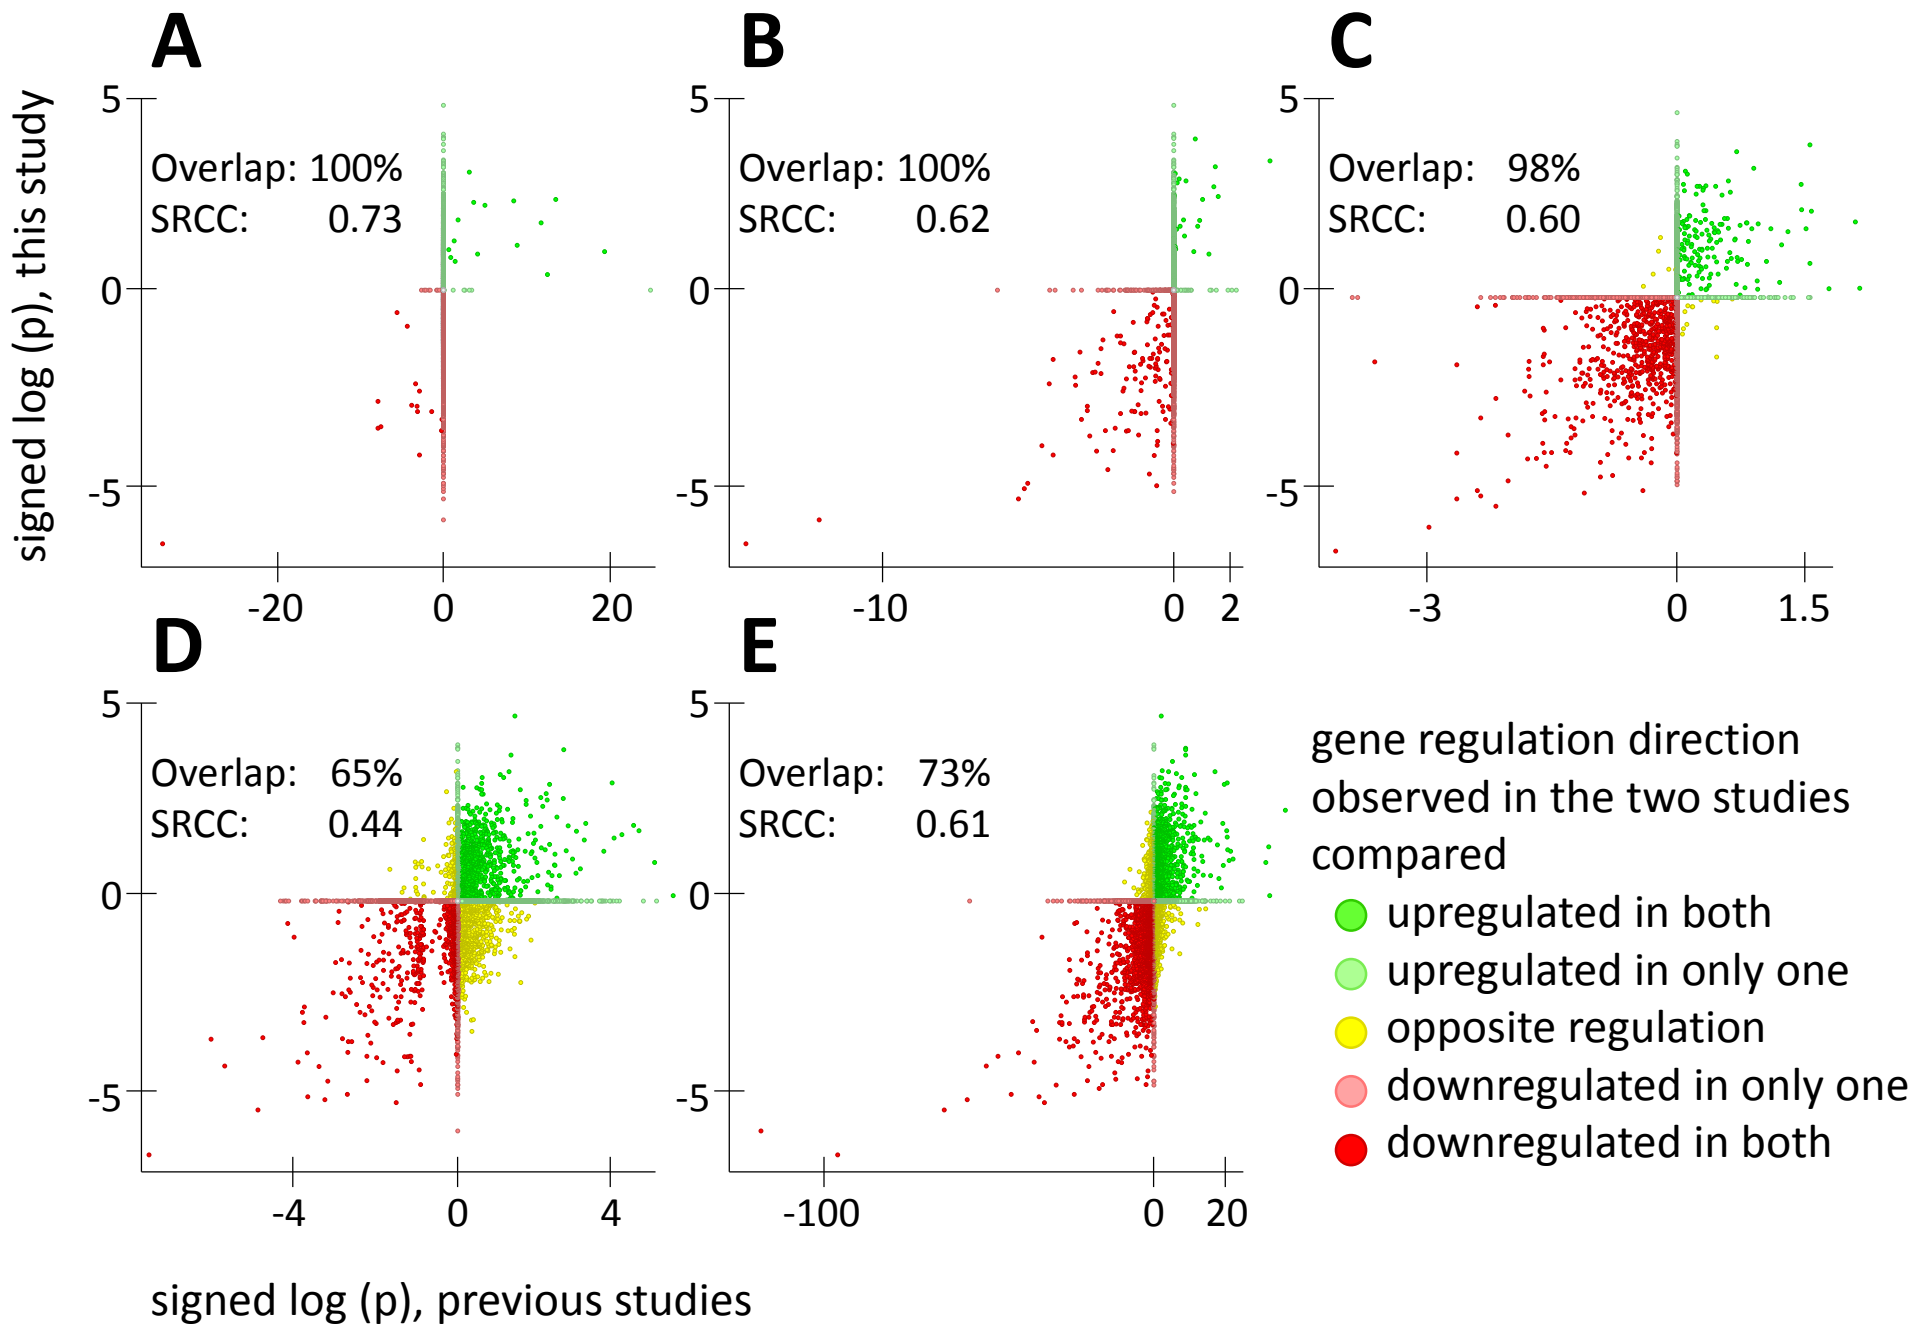

Supplement: ACEL-16-716-s001.pdf [file ACEL-16-716-s001.pdf]
